# Supplementary material for: Bispecific antibody targeting TROP2xCD3 suppresses tumor growth of triple negative breast cancer
Source: HighWire-hosted journal article supplement (doi:10.1136/jitc-2021-003468), 2021-10-01
Supplement: jitc-2021-003468supp008_data_supplement.pdf [file jitc-2021-003468supp008_data_supplement.pdf]

**Table S1. Baseline characteristics of TNBC patients**

## A. Human primary TNBC isolation

| <b>Gender</b> | <b>Age, y</b> | <b>Histology</b> | <b>Diagnostic</b>                      |
|---------------|---------------|------------------|----------------------------------------|
| female        | 67            | TNBC             | ER (5%), PR (-), HER2 (FISH, negative) |

## B. Breast cancer specimen used for immunohistochemistry

| <b>Characteristics</b>       | <b>Patients (N=33)</b> |
|------------------------------|------------------------|
| <b>Median (range) age, y</b> | 51 (30-77)             |
| <b>Age distribution, y</b>   |                        |
| <56                          | 24 (72.7)              |
| ≥56                          | 9 (27.3)               |
| <b>Gender</b>                |                        |
| male                         | 0 (0)                  |
| female                       | 33 (100)               |
| <b>Histologic subtypes</b>   |                        |
| HER2 <sup>+</sup>            | 12 (36.4)              |
| Luminal                      | 12 (36.4)              |
| TNBC                         | 9 (27.2)               |

Note: Values shown are n (%) unless otherwise indicated.
