# Supplementary figures and images for: Bispecific antibody targeting TROP2xCD3 suppresses tumor growth of triple negative breast cancer
Source: HighWire-hosted journal article supplement (doi:10.1136/jitc-2021-003468), 2021-10-01

Figure S5

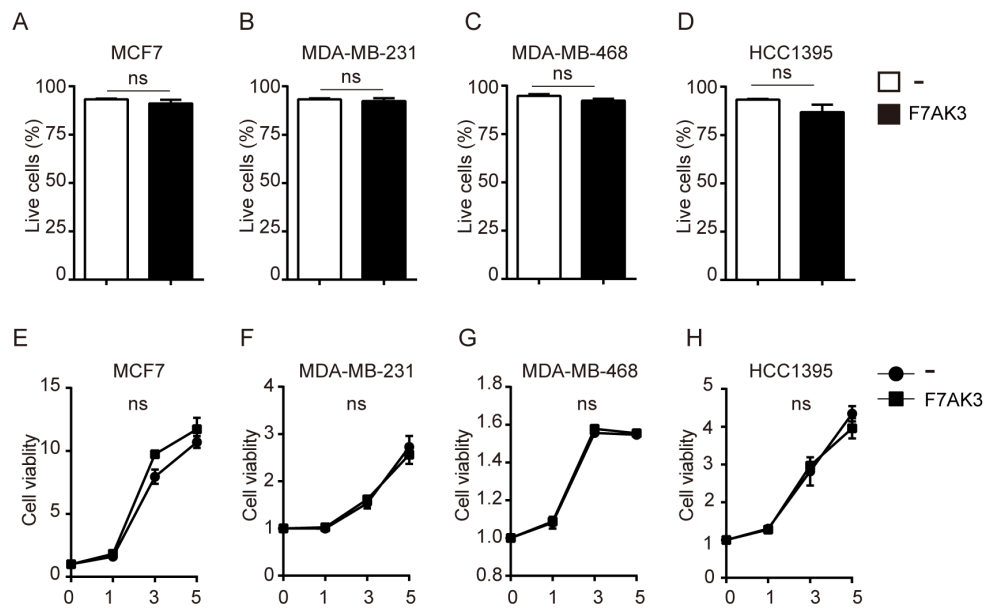

Supplement: jitc-2021-003468supp006_data_supplement.pdf [file jitc-2021-003468supp006_data_supplement.pdf]

Figure S1

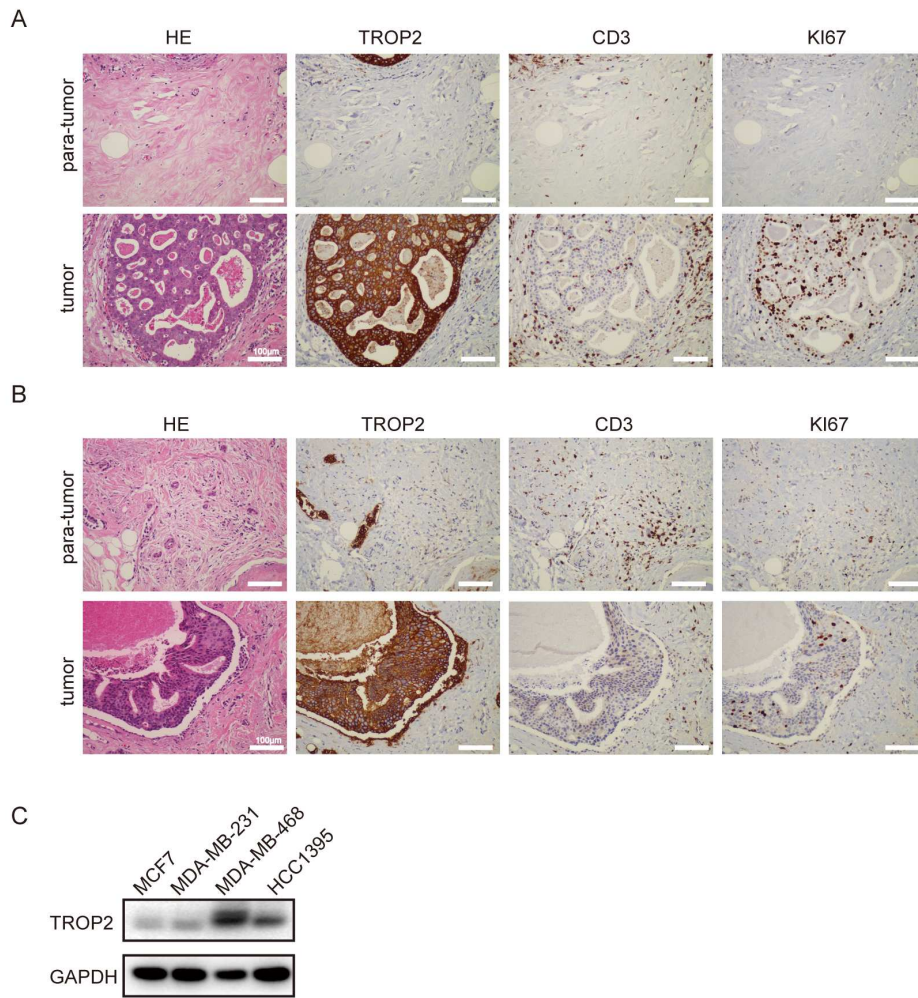

Supplement: jitc-2021-003468supp002_data_supplement.pdf [file jitc-2021-003468supp002_data_supplement.pdf]

Figure S4

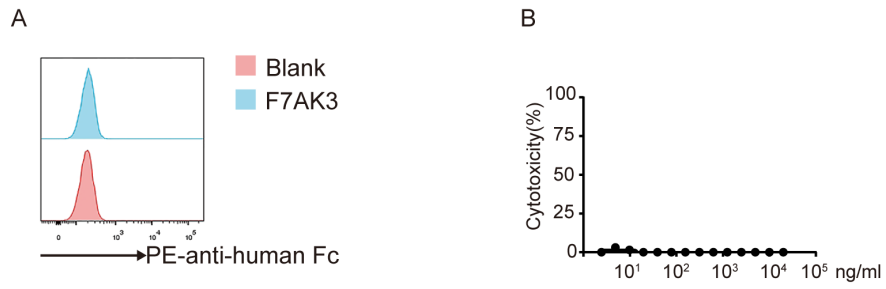

Supplement: jitc-2021-003468supp005_data_supplement.pdf [file jitc-2021-003468supp005_data_supplement.pdf]
